# Supplementary material for: Megagenomoviruses with nearly five megabase genomes and ribosomal proteins
Source: Research Square preprint supplement (doi:10.21203/rs.3.rs-8000643/v1), 2025-11-13
Supplement: Supplementary file 1 [file b9d3be16f25fd5c6bec0b4fd.xlsx]

## Sheet: GVClass
query	taxonomy_majority	species	genus	family	order	class	phylum	domain	avgdist	order_dup	order_completeness	gvog4_unique	gvog8_unique	gvog8_total	gvog8_dup	mcp_total	mirus_unique	mirus_total	mirus_dup	mrya_unique	mrya_total	phage_unique	phage_total	cellular_unique	cellular_total	cellular_dup	contigs	LENbp	GCperc	genecount	CODINGperc	ttable	weighted_order_completeness
RhikV3	d_NCLDV;p_Nucleocytoviricota;c_Megaviricetes;o_Imitervirales;f_IM_16;g_;s_	NCLDV__singleton:23(36.51%),NCLDV__S1295:22(34.92%),EUK__Halteromyces radiatus:3(4.76%),BAC__WRAP01 sp009780135:1(1.59%),ARC__JASKKU01 sp030154045:1(1.59%),NCLDV__S1361:1(1.59%),BAC__SP4260 sp902512585:1(1.59%),ARC__CSSED10-269 sp003558235:1(1.59%),BAC__SBBA01 sp005239925:1(1.59%),BAC__UBA1446 sp002329245:1(1.59%),BAC__JAEUMD01 sp040765305:1(1.59%),BAC__JAISCN01 sp031265515:1(1.59%),EUK__Microcyc…	NCLDV__g1581:22(34.92%),NCLDV__g234:14(22.22%),EUK__Halteromyces:3(4.76%),NCLDV__g1523:2(3.17%),BAC__WRAP01:1(1.59%),NCLDV__g220:1(1.59%),ARC__JASKKU01:1(1.59%),NCLDV__g238:1(1.59%),BAC__SP4260:1(1.59%),ARC__CSSED10-269:1(1.59%),BAC__SBBA01:1(1.59%),BAC__UBA1446:1(1.59%),BAC__JAEUMD01:1(1.59%),BAC__JAISCN01:1(1.59%),EUK__Microcyclospora:1(1.59%),EUK__Filosporella:1(1.59%),BAC__WGFY01:1(1.59%),BAC…	NCLDV__IM_16:44(69.84%),EUK__Cunninghamellaceae:3(4.76%),EUK__NA:2(3.17%),BAC__Pumilibacteraceae:1(1.59%),ARC__JASKKU01:1(1.59%),BAC__CABXJW01:1(1.59%),ARC__B1Sed10-29:1(1.59%),BAC__SBBA01:1(1.59%),BAC__Oscillospiraceae:1(1.59%),BAC__Hyphomicrobiaceae:1(1.59%),BAC__CAMVHY01:1(1.59%),BAC__Mesoaciditogaceae:1(1.59%),BAC__Profunditerraquicolaceae:1(1.59%),BAC__TCS61:1(1.59%),EUK__Sarocladiaceae:1(1.…	NCLDV__Imitervirales:45(71.43%),EUK__Mucorales:3(4.76%),BAC__Christensenellales:1(1.59%),ARC__Woesearchaeales:1(1.59%),BAC__CABXJW01:1(1.59%),ARC__B1Sed10-29:1(1.59%),BAC__SBBL01:1(1.59%),BAC__Oscillospirales:1(1.59%),BAC__Rhizobiales:1(1.59%),BAC__Lachnospirales:1(1.59%),EUK__Capnodiales:1(1.59%),EUK__Helotiales:1(1.59%),BAC__Mesoaciditogales:1(1.59%),BAC__Gygaellales:1(1.59%),BAC__Cloacimonadal…	NCLDV__Megaviricetes:46(73.02%),BAC__Clostridia:3(4.76%),EUK__Mucoromycetes:3(4.76%),ARC__Nanobdellia:1(1.59%),BAC__Gammaproteobacteria:1(1.59%),ARC__B1Sed10-29:1(1.59%),BAC__Nitrospiria:1(1.59%),BAC__Alphaproteobacteria:1(1.59%),EUK__Dothideomycetes:1(1.59%),EUK__Leotiomycetes:1(1.59%),BAC__Thermotogae:1(1.59%),BAC__Koll11:1(1.59%),BAC__Cloacimonadia:1(1.59%),EUK__Sordariomycetes:1(1.59%)	NCLDV__Nucleocytoviricota:46(73.02%),BAC__Bacillota:3(4.76%),EUK__Dikarya___Ascomycota:3(4.76%),EUK__Fungi incertae sedis___Mucoromycota:3(4.76%),BAC__Pseudomonadota:2(3.17%),ARC__Nanobdellota:1(1.59%),ARC__B1Sed10-29:1(1.59%),BAC__Nitrospirota:1(1.59%),BAC__Thermotogota:1(1.59%),BAC__Omnitrophota:1(1.59%),BAC__Cloacimonadota:1(1.59%)	NCLDV:46(73.02%),BAC:9(14.29%),EUK:6(9.52%),ARC:2(3.17%)	1.16036	2.76	56.8182	4	7	21	3	24	0	0	0	3	17	5	12	27	80	2.96296	336	4221181	29.8052	3083	85.85	codemeta	60.0007
RhikV2	d_NCLDV;p_Nucleocytoviricota;c_Megaviricetes;o_Imitervirales;f_IM_16;g_;s_	NCLDV__singleton:26(38.81%),NCLDV__S1295:23(34.33%),NCLDV__S780:3(4.48%),BAC__SP4260 sp902512585:3(4.48%),BAC__WRAP01 sp009780135:1(1.49%),ARC__JASKKU01 sp030154045:1(1.49%),BAC__SBBA01 sp005239925:1(1.49%),BAC__JAEUMD01 sp040765305:1(1.49%),BAC__JAQVVM01 sp028698995:1(1.49%),BAC__Thermosinus thermophilus:1(1.49%),BAC__Estrella lausannensis:1(1.49%),BAC__WGFY01 sp015491995:1(1.49%),BAC__WGAO01 sp…	NCLDV__g1581:23(34.33%),NCLDV__g234:15(22.39%),NCLDV__g336:3(4.48%),BAC__SP4260:3(4.48%),NCLDV__g220:2(2.99%),NCLDV__g1523:2(2.99%),NCLDV__g343:2(2.99%),BAC__WRAP01:1(1.49%),ARC__JASKKU01:1(1.49%),BAC__SBBA01:1(1.49%),BAC__JAEUMD01:1(1.49%),BAC__JAQVVM01:1(1.49%),BAC__Thermosinus:1(1.49%),BAC__Estrella:1(1.49%),BAC__WGFY01:1(1.49%),BAC__WGAO01:1(1.49%),BAC__JAIORE01:1(1.49%),NCLDV__g1213:1(1.49%)…	NCLDV__IM_16:47(70.15%),NCLDV__IM_01:5(7.46%),BAC__CABXJW01:3(4.48%),BAC__Pumilibacteraceae:1(1.49%),ARC__JASKKU01:1(1.49%),BAC__SBBA01:1(1.49%),BAC__Hyphomicrobiaceae:1(1.49%),BAC__PXBB01:1(1.49%),BAC__Thermosinaceae:1(1.49%),BAC__Criblamydiaceae:1(1.49%),BAC__Mesoaciditogaceae:1(1.49%),BAC__Thermotogaceae:1(1.49%),BAC__TCS61:1(1.49%),NCLDV__SI_18:1(1.49%),EUK__Salpingoecidae:1(1.49%)	NCLDV__Imitervirales:52(77.61%),BAC__CABXJW01:3(4.48%),BAC__Christensenellales:1(1.49%),ARC__Woesearchaeales:1(1.49%),BAC__SBBL01:1(1.49%),BAC__Rhizobiales:1(1.49%),BAC__Bacteroidales:1(1.49%),BAC__Sporomusales:1(1.49%),BAC__Chlamydiales:1(1.49%),BAC__Mesoaciditogales:1(1.49%),BAC__Thermotogales:1(1.49%),BAC__Cloacimonadales:1(1.49%),NCLDV__split_Imitervirales:1(1.49%),EUK__Craspedida:1(1.49%)	NCLDV__Megaviricetes:53(79.10%),BAC__Gammaproteobacteria:3(4.48%),BAC__Thermotogae:2(2.99%),BAC__Clostridia:1(1.49%),ARC__Nanobdellia:1(1.49%),BAC__Nitrospiria:1(1.49%),BAC__Alphaproteobacteria:1(1.49%),BAC__Bacteroidia:1(1.49%),BAC__Negativicutes:1(1.49%),BAC__Chlamydiia:1(1.49%),BAC__Cloacimonadia:1(1.49%),EUK__Choanoflagellata:1(1.49%)	NCLDV__Nucleocytoviricota:53(79.10%),BAC__Pseudomonadota:4(5.97%),BAC__Bacillota:2(2.99%),BAC__Thermotogota:2(2.99%),ARC__Nanobdellota:1(1.49%),BAC__Nitrospirota:1(1.49%),BAC__Bacteroidota:1(1.49%),BAC__Chlamydiota:1(1.49%),BAC__Cloacimonadota:1(1.49%),EUK__NA:1(1.49%)	NCLDV:53(79.10%),BAC:12(17.91%),ARC:1(1.49%),EUK:1(1.49%)	1.22948	2.85714	47.7273	4	6	23	3.83333	24	0	0	0	4	20	6	13	25	68	2.72	325	4342807	29.7358	3230	84.99	codemeta	50.5542
RhikV1	d_NCLDV;p_Nucleocytoviricota;c_Megaviricetes;o_Imitervirales;f_IM_16;g_;s_	NCLDV__S1295:25(37.31%),NCLDV__singleton:24(35.82%),NCLDV__S780:4(5.97%),EUK__Halteromyces radiatus:2(2.99%),NCLDV__S2419:1(1.49%),BAC__SP4260 sp902512585:1(1.49%),BAC__UBA1446 sp002329245:1(1.49%),BAC__JAISCN01 sp031265515:1(1.49%),EUK__Microcyclospora pomicola:1(1.49%),BAC__JAJOKN01 sp021129815:1(1.49%),EUK__Filosporella fistucella:1(1.49%),BAC__WGFY01 sp015491995:1(1.49%),BAC__JAIORE01 sp02110…	NCLDV__g1581:25(37.31%),NCLDV__g234:16(23.88%),NCLDV__g336:4(5.97%),NCLDV__g235:2(2.99%),NCLDV__g1523:2(2.99%),EUK__Halteromyces:2(2.99%),NCLDV__g1455:1(1.49%),BAC__SP4260:1(1.49%),NCLDV__g233:1(1.49%),BAC__UBA1446:1(1.49%),BAC__JAISCN01:1(1.49%),EUK__Microcyclospora:1(1.49%),BAC__JAJOKN01:1(1.49%),EUK__Filosporella:1(1.49%),BAC__WGFY01:1(1.49%),BAC__JAIORE01:1(1.49%),EUK__Parasarocladium:1(1.49%…	NCLDV__IM_16:51(76.12%),NCLDV__IM_01:4(5.97%),EUK__NA:2(2.99%),EUK__Cunninghamellaceae:2(2.99%),BAC__CABXJW01:1(1.49%),BAC__Oscillospiraceae:1(1.49%),BAC__CAMVHY01:1(1.49%),BAC__Desulfohalotomaculaceae:1(1.49%),BAC__Mesoaciditogaceae:1(1.49%),BAC__TCS61:1(1.49%),EUK__Sarocladiaceae:1(1.49%),NCLDV__IM_12:1(1.49%)	NCLDV__Imitervirales:56(83.58%),EUK__Mucorales:2(2.99%),BAC__CABXJW01:1(1.49%),BAC__Oscillospirales:1(1.49%),BAC__Lachnospirales:1(1.49%),EUK__Capnodiales:1(1.49%),BAC__Desulfotomaculales:1(1.49%),EUK__Helotiales:1(1.49%),BAC__Mesoaciditogales:1(1.49%),BAC__Cloacimonadales:1(1.49%),EUK__Hypocreales:1(1.49%)	NCLDV__Megaviricetes:56(83.58%),BAC__Clostridia:2(2.99%),EUK__Mucoromycetes:2(2.99%),BAC__Gammaproteobacteria:1(1.49%),EUK__Dothideomycetes:1(1.49%),BAC__Desulfotomaculia:1(1.49%),EUK__Leotiomycetes:1(1.49%),BAC__Thermotogae:1(1.49%),BAC__Cloacimonadia:1(1.49%),EUK__Sordariomycetes:1(1.49%)	NCLDV__Nucleocytoviricota:56(83.58%),BAC__Bacillota:3(4.48%),EUK__Dikarya___Ascomycota:3(4.48%),EUK__Fungi incertae sedis___Mucoromycota:2(2.99%),BAC__Pseudomonadota:1(1.49%),BAC__Thermotogota:1(1.49%),BAC__Cloacimonadota:1(1.49%)	NCLDV:56(83.58%),BAC:6(8.96%),EUK:5(7.46%)	1.12988	3	54.5455	4	7	25	3.57143	24	0	0	0	4	17	6	13	25	81	3.24	326	4629790	29.6986	3390	84.66	codemeta	50.7166

## Sheet: CheckV
contig_id	contig_length	provirus	proviral_length	gene_count	viral_genes	host_genes	checkv_quality	miuvig_quality	completeness	completeness_method	contamination	kmer_freq	warnings
RhikV 1	4662290	No	NaN	3271	330	92	High-quality	High-quality	100	HMM-based (lower-bound)	0	1.05	NaN
RhikV 2	4375207	No	NaN	3103	306	79	High-quality	High-quality	100	HMM-based (lower-bound)	0	1.05	NaN
RhikV 3	4254681	No	NaN	2948	309	84	High-quality	High-quality	100	HMM-based (lower-bound)	0	1.04	NaN
