# Supplementary material for: Megagenomoviruses with nearly five megabase genomes and ribosomal proteins
Source: Research Square preprint supplement (doi:10.21203/rs.3.rs-8000643/v1), 2025-11-13
Supplement: Supplementary file 2 [file d7e745031bddc4569823a30a.xlsx]

## Sheet: Sheet1
Genome_id	Total assembly size (Mb)	GC content (%)	Coding density (%)	Average protein length (aa)	min_GC_per_contig	mean_GC_per_contig	max_GC_per_contig	difference_mean_min	difference_max_mean
Hokovirus_HKV1	1.32623	21.42	86.9237	375.997	20.4	21.1	22.02	0.7	0.92
Homavirus	0.45665	29.09	87.3833	294.927	25.27	29.11	33.46	3.84	4.35
Fadolivirus_algeromassiliense	1.5735	27.08	90.2757	331.581	27.08	27.08	27.08	0	0
Klosneuvirus_KNV1	1.57308	28.63	88.8157	301.434	23.04	27.8	31.35	4.76	3.55
Barrevirus	0.604913	31.59	80.6085	276.894	28.88	31.66	36.34	2.78	4.68
Indivirus_ILV1	0.861511	26.61	86.3293	333.215	24.19	26.76	30.03	2.57	3.27
Gaeavirus	0.549019	32.3	81.4567	291.154	28.51	32.32	36.46	3.81	4.14
Catovirus_CTV1	1.53226	26.4	84.6953	303.142	26.39	26.42	26.45	0.03	0.03
Edafosvirus	1.25555	27.6	87.2265	278.458	22.44	27.4	33.81	4.96	6.41
Terrestrisvirus	1.79024	28.82	87.686	316.745	26.12	29.22	32.53	3.1	3.31
Harvfovirus	1.55362	36	87.0981	282.795	29.58	36.02	40.07	6.44	4.05
Hyperionvirus	2.3774	37.4	85.6736	272.337	30.86	37.61	41.56	6.75	3.95
Bodo_saltans_virus	1.38587	25.31	84.1499	322.068	25.31	25.31	25.31	0	0
GVMAG-M-3300023179-27	1.05781	27.86	88.5767	320.003	25.54	28	29.77	2.46	1.77
RhikV 3 (IMGS3300050451_BIN25)	4.22118	29.81	85.8246	392.717	23.34	29.67	36.52	6.33	6.85
RhikV 1 (IMGS3300050570_BIN45)	4.62979	29.7	84.6215	386.371	24.24	29.49	35.36	5.25	5.87
RhikV 2 (IMGS3300050569_BIN31)	4.34281	29.74	84.9653	381.383	23.81	29.56	35.51	5.75	5.95
GVMAG-M-3300023179-103	0.672449	25.77	92.6925	311.033	24.82	25.87	26.89	1.05	1.02
Dasosvirus	0.301586	31.29	86.8976	287.359	26.95	30.97	33.37	4.02	2.4
GVMAG-S-3300013131-119	1.03987	27.45	90.4717	339.757	24.04	27.21	30.27	3.17	3.06
Yasm	2.12634	40.23	88.2178	397.755	39.08	39.69	40.3	0.61	0.61
